# Supplementary material for: Covid-19 Crisis and Sustainability Reporting of ESG in Jordanian Banking Industry
Source: Research Square preprint supplement (doi:10.21203/rs.3.rs-6567043/v1), 2025-05-23
Supplement: Supplementary file 1 [file dc3e554940cf3d15ec8badf2.docx]

**Table (1): Sampling**

| Item | Total Banks | Observations |
| --- | --- | --- |
| Total Banks | **24** | **360** |
| *(-) Missing data* | *(8)* | *(120)* |
| Total accepted banks | **16** | **240** |

**Table (2): Descriptive Statistics**

| **Variable** | **Mean** | **Median** | **Std. Dev.** | **Min** | **Max** |
| --- | --- | --- | --- | --- | --- |
| *Sus_Reporting* | 7.876 | 0.000 | 16.014 | 0.000 | 68.855 |
| *Sus_Environment reporting* | 1.143 | 0.000 | 2.465 | 0.000 | 15.007 |
| *Sus_Social reporting* | 2.231 | 0.000 | 5.407 | 0.000 | 27.542 |
| *Sus_Government reporting* | 4.496 | 0.000 | 9.089 | 0.000 | 34.427 |
| *RE* | 0.005 | 0.001 | 0.038 | 0.000 | 0.592 |
| *Period* | 0.25 | 0.000 | 0.434 | 0.000 | 1.000 |
| *Log_assets* | 21.108 | 21.259 | 0.860 | 18.421 | 22.291 |
| *LEV* | 4.443 | 4.456 | 0.118 | 2.855 | 4.551 |
| *Audit_op* | 0.977 | 1.000 | 0.152 | 0.000 | 1.000 |
| *Audit_ten* | 0.508 | 1.000 | 0.501 | 0.000 | 1.000 |
| *BIG-4* | 0.965 | 1.000 | 0.185 | 0.000 | 1.000 |
| *Block* | 0.660 | 0.730 | 0.206 | 0.172 | 0.992 |
| *For* | 0.360 | 0.265 | 0.290 | 0.000 | 0.904 |
| ***N*** | ***240*** | | | | |
| *See table A.1 in Appendix A for variables definition.* | | | | | |

**Table (3): Correlation matrix**

|  | ***Variables*** | ***1*** | ***2*** | ***3*** | ***4*** | ***5*** | ***6*** | ***7*** | ***8*** | ***9*** |
| --- | --- | --- | --- | --- | --- | --- | --- | --- | --- | --- |
| ***1*** | *Sus_Reporting* | 1.000 |  |  |  |  |  |  |  |  |
| ***3*** | *Period* | 0.628*** | 1.000 |  |  |  |  |  |  |  |
| ***4*** | *Log_assets* | 0.354*** | 0.299*** | 1.000 |  |  |  |  |  |  |
| ***5*** | *LEV* | 0.411*** | 0.057 | 0.614*** | 1.000 |  |  |  |  |  |
| ***6*** | *Audit_op* | -0.025 | -0.030 | 0.260*** | 0.143* | 1.000 |  |  |  |  |
| ***7*** | *Audit_ten* | -0.201** | -0.460*** | 0.018 | -0.015 | 0.002 | 1.000 |  |  |  |
| ***8*** | *BIG-4* | 0.094 | 0.110 | 0.053 | 0.031 | 0.111 | -0.018 | 1.000 |  |  |
| ***9*** | *Block* | -0.199** | 0.095 | -0.121 | -0.451*** | 0.042 | 0.102 | -0.022 | 1.000 |  |
| ***10*** | *For* | -0.130* | 0.109 | -0.053 | -0.068 | 0.088 | 0.132* | 0.030 | 0.549*** | 1.000 |
| *“This table presents Spearman correlation matrix results amongst the dependent and independent variables.”*  *“All continuous variables are winsorized at the 1% and 99% levels each year to reduce the influence of potential outliers.”*  *“**, * Correlation is significant at the 0.01, 0.05 level (2-tailed), respectively.”* | | | | | | | | | | |

**Table (4): Result of OLS Regression**

| **DV =** | **Model (1)**  ***Coeff.***  *Sus_Reporting* | **Model (2)**  ***Coeff.***  *Sus_Environment reporting* | **Model (3)**  ***Coeff.***  *Sus_Social reporting* | **Model (4)**  ***Coeff.***  *Sus_Government reporting* |
| --- | --- | --- | --- | --- |
| ***Intercept*** | ***72.458*** | ***52.372*** | ***53.026*** | ***51.027*** |
|  | ***(2.02)***** | ***(1.46)***** | ***(1.57)***** | ***(1.23)***** |
| *Period* | 39.421 | 4.098 | 3.851 | 3.721 |
|  | (8.63)*** | (2.91)** | (3.11)*** | (3.22)*** |
| *Log_assets* | -3.821 | -3.358 | -3.419 | -3.330 |
|  | (-2.09)** | (-1.800)* | (-1.920)* | (-1.500) |
| *LEV* | 2.844 | -3.269 | -2.164 | -3.473 |
|  | (2.99)*** | (-0.570) | (-0.340) | (-0.460) |
| *Audit_op* | -0.183 | 1.716 | 3.309 | 6.090 |
|  | (-0.07) | (0.490) | (1.010) | (1.400) |
| *Audit_ten* | 4.794 | 3.621 | 3.625 | 5.886 |
|  | (2.39)** | (1.670) | (1.580) | (1.530) |
| *BIG-4* | 1.047 | 6.089 | 6.446 | 8.241 |
|  | -0.470 | (1.350) | (1.420) | (1.380) |
| *Block* | 1.151 | 15.655 | 16.070 | 14.022 |
|  | -0.190 | (1.310) | (1.600) | (1.270) |
| *For* | -12.495 | -16.298 | -16.769 | -18.217 |
|  | (-2.54)** | (-2.28)** | (-2.44)** | (-2.60)*** |
| ***Firm clustering& Year*** | ***Included*** | ***Included*** | ***Included*** | ***Included*** |
| ***N*** | ***240*** | ***240*** | ***240*** | ***240*** |
| ***F - Statistic*** | ***(15)****** | ***(15)****** | ***(15)****** | ***(15)****** |
| ***R2*** | ***68%*** | ***43%*** | ***42%*** | ***28%*** |
| ***Mean VIF*** | ***2.32*** | ***2.32*** | ***2.32*** | ***2.32*** |
| *“***, **, * Indicate statistical signiﬁcance at the 0.01, 0.05, and 0.10 percent levels, respectively, using a two-tailed test.”*  *“This table presents the OLS regressions of Covid-19 on Sus_Reporting over the period (2010-2024) controlled by year and firm clustering.”* | | | | |

**Table (5): Result of Alternative measure**

| **DV =** | **Model (1)**  ***Coeff.***  *Sust_Dummy* |
| --- | --- |
| ***Intercept*** | ***0.879*** |
|  | ***(1.60)***** |
| *Period* | 1.033 |
|  | (29.69)*** |
| *Log_assets* | -0.042 |
|  | (-1.480) |
| *LEV* | 0.033 |
|  | (-1.950)* |
| *Audit_op* | -0.028 |
|  | (-0.410) |
| *Audit_ten* | 0.083 |
|  | (-1.890)* |
| *BIG-4* | 0.039 |
|  | (-1.090) |
| *Block* | -0.089 |
|  | (-0.700) |
| *For* | -0.175 |
|  | (-1.530) |
| ***Firm clustering& Year*** | ***Included*** |
| ***N*** | ***240*** |
| ***F - Statistic*** | ***(15)****** |
| ***R2*** | ***73%*** |
| ***Mean VIF*** | ***2.32*** |
| *“***, **, * Indicate statistical signiﬁcance at the 0.01, 0.05, and 0.10 percent levels, respectively, using a two-tailed test.”*  *“This table presents the “OLS regressions” of EM on Sus_Reporting over the period (2010-2024) controlled by year and firm clustering using the following equation:*  *Sust_Dummy = δ0+ δ1RE +* *δ2Log_assets +δ3SUB+ δ4Audit_op+ δ5Audit_ten+ δ6BIG-4 + δ7Block+ δ8For+ FE+ ɛ.*  *Where: Where: “Dummy variable Sust_Dummy, I follow prior research using a scoring system of 1 for disclosed items and 0 for items not disclosed.”* | |

**Appendix A**

**Table A.1: Variables measurements**

| **Variable** | **Measurement** |
| --- | --- |
| *Sus_Reporting* | “Explanatory variable is the ESG disclosure index of the bank (i) during the period (t). A qualitative scoring index was used in this study to assess the bank’s ESG practices.” |
| *Sus_Environment reporting* | “Explanatory variable is the ESG disclosure index of the bank (i) during the period (t). A qualitative scoring index was used in this study to assess the bank’s ESG practices.” |
| *Sus_Social reporting* |
| *Sus_Government reporting* |
| *Period* | “Dummy variable coded 1 for the years affected by Covid-19 which are the years of (2019 - 2020), while 0 stands for the pre-Covid-19 period (2005 – 2018).” |
| *Log_assets* | “The natural logarithm of a company's total assets expressed as a percentage.” |
| *LEV* | “The total debt divided by the total assets.” |
| *Audit_op* | “Dummy variable with a value of 1 in the event of an unqualified opinion, 0 otherwise.” |
| *Audit_ten* | “Three-year auditor tenure: 0 if the audit firm did not change, and 1 otherwise.” |
| *BIG-4* | “If the audit company is one of the "Big 4”, the dummy variable is set to 1. If it's not, it's set to 0.” |
| *Block* | “Proportion (5% or more) of common stock owned by the individual blockholder.” |
| *For* | “The percentage of the number of total shares held by foreign owners of the total number of a firm’s shares.” |
